# Supplementary material
Source: PubMed Central journal article supplement (PMC6250582)

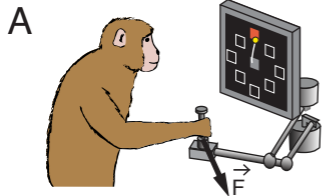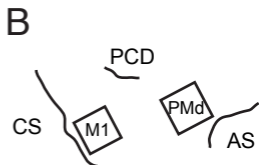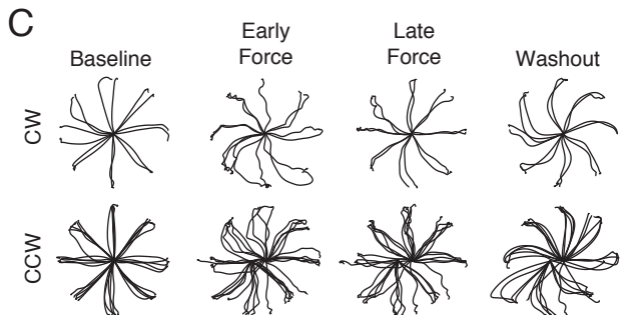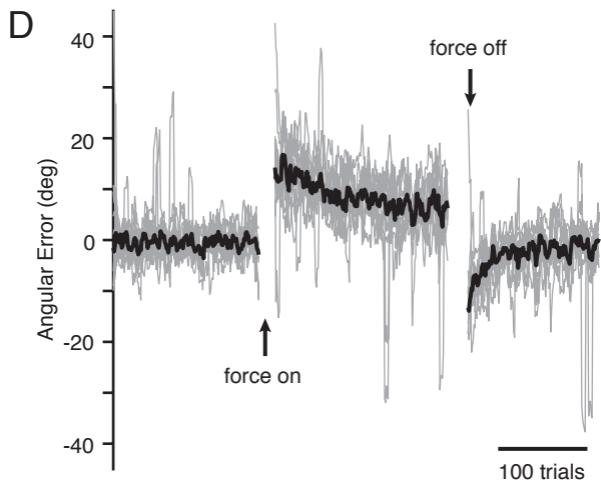

Supplement: NIHMS1507895-supplement-2.pdf [file NIHMS1507895-supplement-2.pdf]

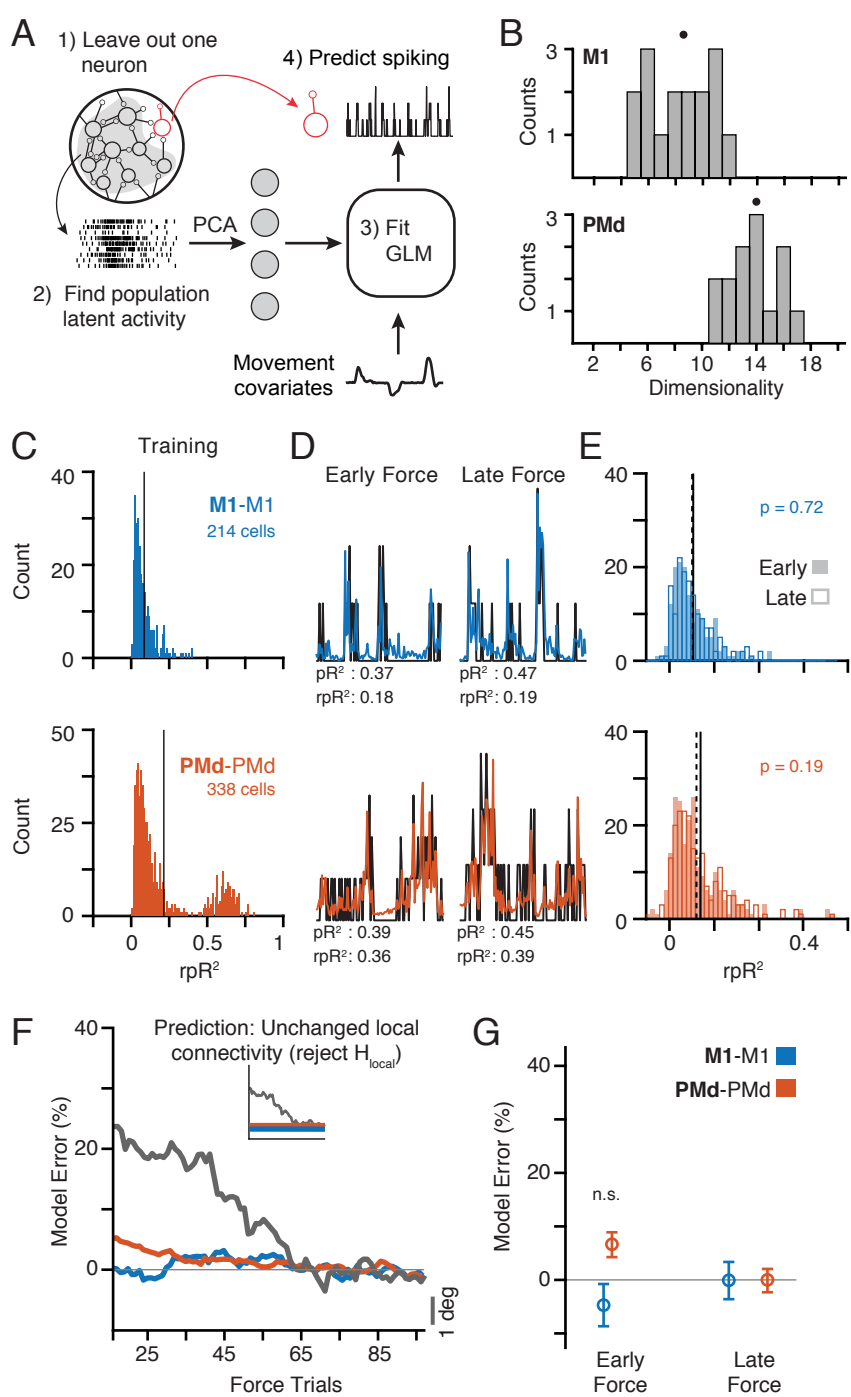

Supplement: NIHMS1507895-supplement-3.pdf [file NIHMS1507895-supplement-3.pdf]

**A**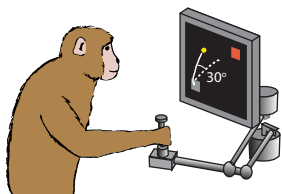**B**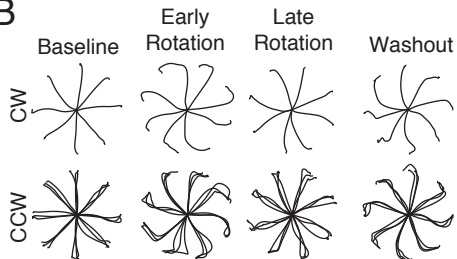**C**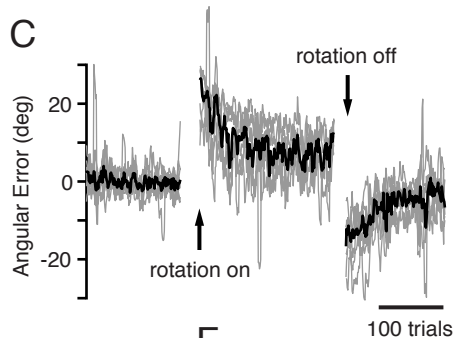**D**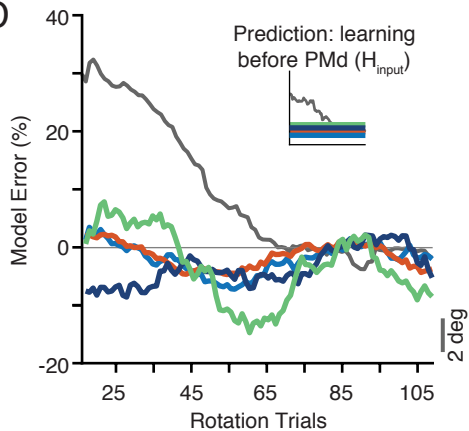**E**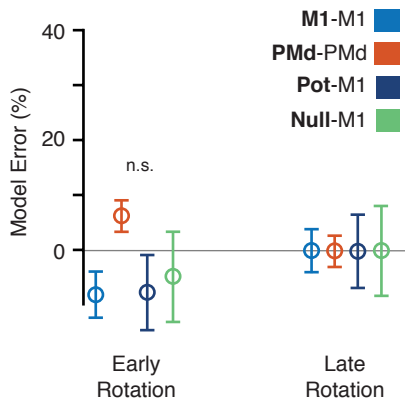**F**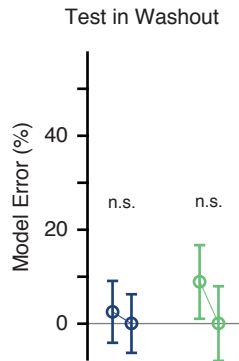

Supplement: NIHMS1507895-supplement-7.pdf [file NIHMS1507895-supplement-7.pdf]
